# Supplementary material
Source: PubMed Central journal article supplement (PMC1865657)
Supplement: eukcell_EC.00362-06_1.pdf [file eukcell_EC.00362-06_1.pdf]

Table 1S. Compounds isolated from *A.nidulans* strains

| Compounds <i>cfwA</i> <sup>+</sup> | Weight  | Compounds <i>cfwA2</i>      | Weight  |
|------------------------------------|---------|-----------------------------|---------|
| Ethyl acetate total extract        | 1.6 g/l | Ethyl acetate total extract | 1.1 g/l |
| CLS12-1                            | 18 mg   |                             |         |
| CLS12-2                            | 26 mg   |                             |         |
| CLS12-3                            | 35 mg   | CLS2-3                      | 52 mg   |
| CLS12-4                            | 45 mg   |                             |         |
| CLS12-5                            | 52 mg   |                             |         |
| CLS12-6                            | 35 mg   | CLS2-6                      | 6 mg    |

Table 2S. <sup>1</sup>H NMR and <sup>13</sup>C NMR main spectral data for dehydroaustinol

| C   | δ     | Multiplicity DEPT* | <sup>1</sup> H/ <sup>13</sup> C connectivity** | Multiplicity <sup>1</sup> H NMR***     |
|-----|-------|--------------------|------------------------------------------------|----------------------------------------|
| 1   | 150.9 | CH                 | H-1 (δ,6.90)                                   | d (10.2 Hz)                            |
| 2   | 116.2 | CH                 | H-2 (δ,5.91)                                   | d (10.2 Hz)                            |
| 3   | 163.5 | C                  | -                                              |                                        |
| 4   | 86.4  | C                  | -                                              |                                        |
| 5   | 44.3  | C                  | -                                              |                                        |
| 6   | 26.9  | CH <sub>2</sub>    | H-6a (δ,1.72);<br>H-6b (δ, 1.78)               | m,<br>td (4.6, 13, 27.7 Hz)            |
| 7   | 26.5  | CH <sub>2</sub>    | H-7a (δ, 2.1);<br>H-7b (δ,1.34)                | td (4.6, 13, 27.7 Hz) dt<br>(3, 13 Hz) |
| 8   | 50.1  | C                  |                                                |                                        |
| 9   | 90.1  | C                  |                                                |                                        |
| 10  | 140.9 | C                  |                                                |                                        |
| 11  | 75.0  | CH                 | H-11(δ, 4.37)                                  | d (4.0 Hz)                             |
| 12  | 16.7  | CH <sub>3</sub>    | H-12 (δ, 1.27)                                 | s                                      |
| 13  | 124.3 | CH <sub>2</sub>    | H-13a (δ, 6.33);<br>H-13b (δ, 5.76)            | s<br>s                                 |
| 14  | 25.7  | CH <sub>3</sub>    | H-14 (δ, 1.53)                                 | s                                      |
| 15  | 23.7  | CH <sub>3</sub>    | H-15 (δ, 1.51)                                 | s                                      |
| 1'  | 114.5 | CH <sub>2</sub>    | H-1'a (δ, 5.84);<br>H-1'b (δ, 5.67)            | s<br>s                                 |
| 2'  | 137.4 | C                  |                                                |                                        |
| 3'  | 83.5  | C                  |                                                |                                        |
| 4'  | 169.0 | C                  |                                                |                                        |
| 5'  | 76.1  | CH                 | H-5' (δ, 5.27)                                 | q (6.8 Hz)                             |
| 6'  | 84.9  | C                  |                                                |                                        |
| 7'  | 64.0  | C                  |                                                |                                        |
| 8'  | 167.2 | C                  |                                                |                                        |
| 9'  | 19.8  | CH <sub>3</sub>    | H-9' (δ, 1.71)                                 | s                                      |
| 10' | 13.54 | CH <sub>3</sub>    | H-10' (δ, 1.65)                                | d (6.8 Hz)                             |
| OH  |       |                    | δ, 2.30                                        | d (4.0Hz)                              |

500 Mhz in CDCl<sub>3</sub>, δ in ppm. \*Multiplicity from DEPT <sup>13</sup>C NMR experiment. \*\*Assignments were confirmed by <sup>1</sup>H COSY, DEPT, HSQC, HMQC and HMBC experiments. \*\*\* Multiplicity from <sup>1</sup>H NMR experiment. Coupling constants (**J** in Hz) indicated in parentheses.

*Aoryzae* BAE65284 324AA 1 -----MQPPQDES-----SNCMVRWYIDTRDITATTSLPLILETLQPPDQESAKREY 47  
*Aterreus* ATEG\_09695 328AA 1 -----MASIQQPT-----NTPLTRWYMDMRNLTN-HPPLPLLDTLKPTQEAVTREFY 46  
*Afumigatus* NpgA 359AA 1 -----MGSAQNER-----IPSLTRWYIDTRQLTVTNPSLPLLEALQPSDQEAVKREY 47  
*Anidulans* CfwA/NpgA 344AA 1 -----MVQDTSSAST-----SPILTRWYIDTRPLTASTAALPLILETLQPADQISVQKY 49  
*Gzeae* EAA71979 292AA 1 MSQ----TQSSPTAIQWVIDTRPLWPLALETKDLTTS--ASRALSLLTTEEQAAVMRY 53  
*Cimmitis* EAS35481 351AA 1 -----MASSAETKEPCLSRGLTRWYMDMRGLSASTSLPLLFTLQPDQEAVKREY 52  
*Ncrassa* EAA36485\* 346 AA 1 MSDNKMSEPPNPNVVIQWILDTRSWFSPAAKTRDLE---ASRPLSLLTPTERASVLKYF 56  
*Mgrisea* MG03046 325AA 1 MSS-----ESSPEIIQWLVDTRKLWPEVAETKQLETFPSSSRALSVLPDDERTAVLKVY 54  
*Cglobosum* EAQ89573 352AA 1 MSD---AETPNKPVIAQWILDTRSWYPEVTQTKOLETH--AARAFALLPPTSRAPIILRVH 55

*Aoryzae* BAE65284 324AA 48 HLKDKHMSLASNLLKYLFIHRTCR-----IPWNQITISRTPPAPHRPYPFNAAGFI 97  
*Aterreus* ATEG\_09695 328AA 47 HQKDRQMSLASNLLKYLFIHRTCR-----IPWPEIIISRTPPAPHRPFCFIPA--- 93  
*Afumigatus* NpgA 359AA 48 HLRDRHMSLASNLLKYLFIHRTSC-----IPWNKISISRTPPDPHRPFCFIPS-PA 96  
*Anidulans* CfwA/NpgA 344AA 50 HLKDKHMSLASNLLKYLFIHVRNCR-----IPWSSIVIISRTPPDPHRPCYIPPSGS 99  
*Gzeae* EAA71979 292AA 54 HVRDAKLALASALLKRYVISRFCQ-----VPWSEAKTI--RDVR-----TKPV 94  
*Cimmitis* EAS35481 351AA 53 HLADRHMSLASCLLKYLFIRHRTCH-----VPWSRIVIISRTPPAPHRPFCYIPLP-- 100  
*Ncrassa* EAA36485\* 346 AA 57 HVRDAKMLASALLKRYAARLAG-----VAWSSTPG-FTRDERT-----TKPI 100  
*Mgrisea* MG03046 325AA 55 FARDAKMSLASHLLKHYVSSKGH-----VPWKETTIT--RNAR-----TKPV 95  
*Cglobosum* EAQ89573 352AA 56 HARDAKMALASALLKHYAVARLMSTDTAASATKAAAWSATLAPFTRDAR-----TKPV 109

*Aoryzae* BAE65284 324AA 98 QTAATDKPII--NIEFNVSHQASLVALAGTILPPSSNNDSIAPTNTVITNPNPTSTPASSI 155  
*Aterreus* ATEG\_09695 328AA 94 ADNPRAAALP--TLEFNVSHQASLVALAGTSTP-SPASTQOKERLLTAAPDPAATPLPSL 150  
*Afumigatus* NpgA 359AA 97 LTEATDEPII--GIEFNVSHQASLVALAGTIIP-QSHGASPNPTTVFANPSPSPVPAHSV 153  
*Anidulans* CfwA/NpgA 344AA 100 QEDSKFDGYTGINVEFNVSHQASMAIAGTAFTPNSSGDS-----KLK 142  
*Gzeae* EAA71979 292AA 95 FISP-SGDEP--LIFNIHQAGLAVLLAVHNP-----PEG----- 126  
*Cimmitis* EAS35481 351AA 101 SADGGENKILINVEFNVSHQASLVALAGYIIPGGSPTSASAANTQISPSPTET--PAT 158  
*Ncrassa* EAA36485\* 346 AA 101 WRDPATGAQP---VAFNVSHQAGIVALVAVADY-----PGPGAQSEAG-----AE 142  
*Mgrisea* MG03046 325AA 96 YVDPNTGRQP---VAFNVTHQAGIVALVAVAGD-----DSGDAG-----A 132  
*Cglobosum* EAQ89573 352AA 110 WLDAPASGAQP---VAFNVSHQAGVVAIVAVAGYRAVVGDDGGSDGVDGVD-----GVG 159

*Aoryzae* BAE65284 324AA 156 PQVGIDITCVNERRN-----TPETRQALE-----DLHGVS-----HIG---- 189  
*Aterreus* ATEG\_09695 328AA 151 PQVGIDITCVNERRAD-----ATPTLALNEYVDIFAEVFSARELETIKS----TAAR--- 199  
*Afumigatus* NpgA 359AA 154 PQVGIDITCVDERHART--SAPSTRDQLAGYVDIFAEVFSARELETIKS----LGGRFPA 208  
*Anidulans* CfwA/NpgA 344AA 143 PEVGIDITCVNERQGR--NGEERSLESRLQYIDIFSEVFTAEMANIRR----LDGVSS 196  
*Gzeae* EAA71979 292AA 127 LAVGVDVVCPTERRDRDLRSLA--DEGWPSFVDMHADVFPGPEVAALKHMNP----- 176  
*Cimmitis* EAS35481 351AA 159 PQVGIDITCTDERARRGKSSIPTTEVDLCSFIDIYAEVFSPREIEIMKSNPTSQHSQAAV 218  
*Ncrassa* EAA36485\* 346 AA 143 VEVGVDVVCSTERRDRDQLIR--KEGWGSFVDMHADVFAMGETTYLKYQVLSVAVPGLVE 200  
*Mgrisea* MG03046 325AA 133 IDVGIDVVCSTERRDRHSMIAQSGDGWARFVDMHADVFAPAEANYLKFVVPQGAARLLN 192  
*Cglobosum* EAQ89573 352AA 160 VEVGVDVVCSTERRARDHMLA--GEGWPAFVDMHADVFAPGEVAYLKHVRVLEAVPGLAA 217

★

*Aoryzae* BAE65284 324AA 189 -----NDEDG-LVEYGFRLFYTYWALKEAYIKMTGEALLAPWLRELVFTNVLAPEPAGR 242  
*Aterreus* ATEG\_09695 328AA 199 -----END--PAYGYRLFYAFWALKEAYIKMTGEALLAPWLRELEFTDVRAPPEPRVQ 249  
*Afumigatus* NpgA 359AA 208 -----DAQDGEAVEYGLRFLFYTYWALKEAYIKMTGEALLAPWLRELEFTDVIAPEPAPA 262  
*Anidulans* CfwA/NpgA 344AA 196 -----SLSADRLVDYGYRLFYTYWALKEAYIKMTGEALLAPWLRELEFSNVVAFAAVAE 250  
*Gzeae* EAA71979 292AA 176 -----GTAISERDCALRYFYALWCLREAYVKMTGDALLASWLKDLMRDFA--PPED-- 226  
*Cimmitis* EAS35481 351AA 218 -----PLSLEGSIQYRLRFYTYWALKEAYIKMTGEALLAPWLRLQLEFVNVPPEPAMD 272  
*Ncrassa* EAA36485\* 346 AA 201 RGAGGGPPTPEQVADGKLRAFYALWALREAYVKLTGEALLAEWLGELEFRYFR--PSWPTP 259  
*Mgrisea* MG03046 325AA 192 -----GTSSELVDYNLRSFYTLWALREAYVKMTGEALLASWLCELEFRFNPEPIPSG 245  
*Cglobosum* EAQ89573 352AA 217 ---AAGAAATVERVSDAKLRAFYTILWALREAYVKLTGEALLAEWLKLEFRGFR--PPAPTA 273

*Aoryzae* BAE65284 324AA 242 -----HLHTWGEPYTGKVTWLYGKEVEDVRLLEVVAFENDYLIATAARGGGIG 289  
*Aterreus* ATEG\_09695 328AA 249 -----HPYTGVRTWLYGKLEVEDVRIEAFEDDYLIATAARGGKVG 290  
*Afumigatus* NpgA 359AA 263 PGQG-----SAENWGEPYTGKVIWLYGKREVEDVRIEVVAFETGYIFATAARAGGLG 313  
*Anidulans* CfwA/NpgA 344AA 251 SGD-----SAGDFGEPYTGVRTTYLYKNLEVEDVRIEVAALGGDYLFATAARGGGIG 300  
*Gzeae* EAA71979 292AA 226 -----MRKVQEAWLRGIKVDGVDLKLMPFLEEYMIATAVRHGLN- 265  
*Cimmitis* EAS35481 351AA 273 G-----ERPAGWSPRTDQVVMYQKVENVRLETVSGKEYVVAATATRGPLG 320  
*Ncrassa* EAA36485\* 346 AA 260 AWDVPAVETKEGEEGEDAQVLRKFEIRFRGKVEDVNMCLRSMGPDYMVATAVTRPEDP 319  
*Mgrisea* MG03046 325AA 246 AGSMAGSL-----EGDDEAIVRDHEIWFQGKLVDDANVCLRALGPDYVVCATAMRTPAEK 299  
*Cglobosum* EAQ89573 352AA 274 GWDVPGRE-----EEGE---VVRDIEIWFKRRVEDVNMCLRSMGEDYMIATAVTRPGRK 325

*Aoryzae* BAE65284 324AA 290 WRS---EGDG----ADPWQRLEKIDIEKDVRPCATGVCQCLK--- 324  
*Aterreus* ATEG\_09695 328AA 291 SAASG--GGEG----IDGWGLRRITIE-DVAPCARGQCQCLDGC- 328  
*Afumigatus* NpgA 359AA 314 AESRPL-SRDAGVAVSVDWRMHMEKIDIDRDIPCATGVCQCTKKQP 359  
*Anidulans* CfwA/NpgA 344AA 301 ASSRPGGGPDGSGIRSQDWPFRPFKLDIERDIQPCATGVCNCLS-- 344  
*Gzeae* EAA71979 292AA 265 --GET-----IDLKDFQSLDIEEILTFGERLPSS----- 292  
*Cimmitis* EAS35481 351AA 321 TGLAT-----WGDFRSIDIDADVAPCALGGALNLEP-- 351  
*Ncrassa* EAA36485\* 346 AA 320 NVGLR-----WRLGPYETLALDDLNFADSAV----- 346  
*Mgrisea* MG03046 325AA 300 EKGLG-----WDMGPFKVLISIDEIVKFAEEQ----- 325  
*Cglobosum* EAQ89573 352AA 326 EDGLG-----WELGPYEVLSLDQVLDFAEGSG----- 352

Figure 1S

**Fig. 1S. The leucine replaced by an arginine in *A. nidulans* CfwA2 is part of a region highly conserved in fungal PPTases.** Fungal PPTases from indicated Ascomycetes were aligned with ClustalW. Sequences are identified by species name, followed by protein name or GenBank accession number and protein size. The conserved leucine (L) replaced by an arginine (R) in *A. nidulans* mutant PPTase CfwA2 is indicated with a star. The asterisk indicates that *Neurospora crassa* (*Ncrassa*) protein was manually deduced as EAAA36485 is missing the first exon and incorrectly annotated as a 284 amino acid protein. Organism names are: *Aoryzae*, *Aspergillus oryzae*; *Aterreus*, *Aspergillus terreus*; *Afumigatus*, *Aspergillus fumigatus*; *Anidulans*, *Aspergillus nidulans*; *Gzeae*, *Gibberella zeae*; *Cimmitis*, *Coccidioides immitis*; *Mgrisea*, *Magnaporthe grisea*; *Cglobosum*, *Chaetomium globosum*.
